# Supplementary material for: A Fast and Robust UHPLC-MRM-MS Method to Characterize and Quantify Grape Skin Tannins after Chemical Depolymerization
Source: PubMed Central journal article supplement (PMC6273201; doi:10.3390/molecules21101409), 2016-10-21
Supplement: molecules-21-01409-s001.pdf [file molecules-21-01409-s001.pdf]

# Supplementary Materials: A Fast and Robust UHPLC-MRM-MS Method to Characterize and Quantify Grape Skin Tannins after Chemical Depolymerization

Lucie Pinasseau, Arnaud Verbaere, Maryline Roques, Emmanuelle Meudec, Anna Vallverdú-Queralt, Nancy Terrier, Jean-Claude Boulet, Véronique Cheynier and Nicolas Sommerer

Table S1. Correction values

|                                | Correction Value |
|--------------------------------|------------------|
| Catechin upper unit            | 2.8              |
| Epicatechin upper unit         | 2.8              |
| Epigallocatechin upper unit    | 11.6             |
| Epicatechin gallate upper unit | 2.4              |

## Calculation of correction values

With the UV detection, the molar ratio (R) between EC<sub>term</sub> and the upper unit (X<sub>up</sub>) is calculated:

$$R = \frac{EC_{term}}{X_{up}} \rightarrow \text{UV detection} \quad (S1)$$

With the MRM detection, the same ratio (R) has to be obtained. So, the theoretical area of the upper unit is calculated (area X<sub>up</sub><sup>theo</sup>) compared to the real obtained area of EC<sub>term</sub> in order to have the same ratio (R) than in UV:

$$\text{Area } X_{up}^{theo} = \frac{\text{area } EC_{term}}{R} \rightarrow \text{MRM detection} \quad (S2)$$

Then, the correction value to be applied to the upper unit (correction value X<sub>up</sub>) corresponds to the ratio between the theoretical area of the upper unit (area X<sub>up</sub><sup>theo</sup>) and the experimental area obtained with MRM detection of the upper unit (area X<sub>up</sub><sup>exp</sup>):

$$\text{Correction value } \times \text{ up} = \frac{\text{area } X_{up}^{theo}}{\text{area } X_{up}^{exp}} \rightarrow \text{MRM detection} \quad (S3)$$

**Table S2.** Concentration levels ( $\mu\text{mol/L}$ ) for each compound in the standard solutions used for method validation.

|                                                                                                               | $\text{EC}_{\text{up}}$ | $\text{EGC}_{\text{up}}$ | $\text{ECG}_{\text{up}}$ | $\text{C}_{\text{term}}$ | $\text{EC}_{\text{term}}$ | $\text{EGC}_{\text{term}}$ | $\text{ECG}_{\text{term}}$ |
|---------------------------------------------------------------------------------------------------------------|-------------------------|--------------------------|--------------------------|--------------------------|---------------------------|----------------------------|----------------------------|
| <b>(1) Solution of White Grape Skins at 20 g/L</b>                                                            |                         |                          |                          |                          |                           |                            |                            |
| A (400 $\mu\text{L}$ of (1))                                                                                  | n.d                     | 572.0                    | n.d                      | n.d                      | n.d                       | n.d                        | n.d                        |
| B (300 $\mu\text{L}$ of (1))                                                                                  | n.d                     | 429.0                    | n.d                      | n.d                      | n.d                       | n.d                        | n.d                        |
| <b>(2) Solution of 50/50 Grape Skins/Seeds at 20 g/L and (3) Commercial Standard Solution of EGC at 1 g/L</b> |                         |                          |                          |                          |                           |                            |                            |
| C (400 $\mu\text{L}$ of (2))                                                                                  | 3339.2                  | 339.3                    | 320.8                    | 1845.1                   | 1709.8                    | n.a                        | 384.0                      |
| D (200 $\mu\text{L}$ of (2) + 164 $\mu\text{L}$ of (3))                                                       | 1669.6                  | 169.6                    | 160.4                    | 922.5                    | 854.9                     | 400.0                      | 192.0                      |
| E (50 $\mu\text{L}$ of (2) + 41 $\mu\text{L}$ of (3))                                                         | 417.4                   | n.a                      | 40.1                     | 230.6                    | 213.7                     | 100.0                      | 48.0                       |
| F (10 $\mu\text{L}$ of (2) + 2 $\mu\text{L}$ of (3))                                                          | n.a                     | n.a                      | n.a                      | 46.1                     | 42.7                      | 5.0                        | 9.6                        |
| G (1 $\mu\text{L}$ of (2))                                                                                    | n.a                     | n.a                      | n.a                      | n.a                      | 4.3                       | n.a                        | 1.0                        |

n.d: non detected; n.a: not applicable.
